# Supplementary material
Source: PubMed Central journal article supplement (PMC3329197)
Supplement: supp_kwr325_kwr325_Web_Tables.pdf [file supp_kwr325_kwr325_Web_Tables.pdf]

**Web Table 1.** Age- and multivariate-adjusted relative risks (RRs) of psoriasis by smoking status in the Nurses' Health Study (1996-2008), the Nurses' Health Study-II (1991-2005), and Health Professionals' Follow-Up Study (1986-2006): additional analyses adjusting for depressive symptoms and antidepressive drug use

|                               | <b>Cases</b> | <b>Person-<br/>years</b> | <b>Multivariate,<br/>adjusted<sup>a</sup></b> |               | <b>Multivariate,<br/>adjusted<sup>b</sup></b> |               | <b>Multivariate,<br/>adjusted<sup>c</sup></b> |               |
|-------------------------------|--------------|--------------------------|-----------------------------------------------|---------------|-----------------------------------------------|---------------|-----------------------------------------------|---------------|
|                               |              |                          | <b>RR</b>                                     | <b>95% CI</b> | <b>RR</b>                                     | <b>95% CI</b> | <b>RR</b>                                     | <b>95% CI</b> |
| <b>NHS</b>                    |              |                          |                                               |               |                                               |               |                                               |               |
| <b>Never smokers</b>          | 295          | 352,829                  | 1.00                                          |               | 1.00                                          |               | 1.00                                          |               |
| <b>Past smokers</b>           | 395          | 336,673                  | 1.32                                          | 1.13, 1.54    | 1.32                                          | 1.13, 1.54    | 1.31                                          | 1.12, 1.53    |
| <b>Current smokers</b>        | 114          | 63,002                   | 2.26                                          | 1.81, 2.82    | 2.24                                          | 1.79, 2.79    | 2.23                                          | 1.78, 2.78    |
| Current smokers, 1- 14/d      | 54           | 31,157                   | 2.19                                          | 1.63, 2.94    | 2.17                                          | 1.62, 2.91    | 2.17                                          | 1.61, 2.90    |
| Current smokers, 15-24/d      | 43           | 24,337                   | 2.22                                          | 1.60, 3.07    | 2.20                                          | 1.59, 3.04    | 2.19                                          | 1.58, 3.03    |
| Current smokers, $\geq 25$ /d | 17           | 7,508                    | 2.65                                          | 1.61, 4.34    | 2.60                                          | 1.59, 4.26    | 2.60                                          | 1.59, 4.27    |
| $P_{\text{trend}}$            |              |                          | <0.0001                                       |               | <0.0001                                       |               | <0.0001                                       |               |
| <b>NHS II</b>                 |              |                          |                                               |               |                                               |               |                                               |               |
| <b>Never smokers</b>          | 629          | 868,253                  | 1.00                                          |               | 1.00                                          |               | 1.00                                          |               |
| <b>Past smokers</b>           | 332          | 311,088                  | 1.40                                          | 1.22, 1.61    | 1.40                                          | 1.22, 1.60    | 1.39                                          | 1.21, 1.59    |
| <b>Current smokers</b>        | 163          | 129,844                  | 1.80                                          | 1.51, 2.14    | 1.78                                          | 1.49, 2.12    | 1.77                                          | 1.49, 2.11    |
| Current smokers, 1-14/d       | 65           | 62,783                   | 1.49                                          | 1.15, 1.92    | 1.47                                          | 1.14, 1.91    | 1.46                                          | 1.13, 1.89    |
| Current smokers, 15- 24/d     | 66           | 47,813                   | 2.00                                          | 1.55, 2.58    | 1.97                                          | 1.53, 2.55    | 1.97                                          | 1.53, 2.54    |
| Current smokers, $\geq 25$ /d | 32           | 19,248                   | 2.33                                          | 1.63, 3.33    | 2.29                                          | 1.60, 3.37    | 2.27                                          | 1.59, 3.25    |
| $P_{\text{trend}}$            |              |                          | <0.0001                                       |               | <0.0001                                       |               | <0.0001                                       |               |

---

**HPFS**

|                               |     |         |      |            |      |                 |
|-------------------------------|-----|---------|------|------------|------|-----------------|
| <b>Never smokers</b>          | 200 | 230,555 | 1.00 | -          | 1.00 |                 |
| <b>Past smokers</b>           | 250 | 188,812 | 1.47 | 1.22, 1.79 | -    | 1.45 1.20, 1.76 |
| <b>Current smokers</b>        | 32  | 22,939  | 1.71 | 1.17, 2.50 | -    | 1.69 1.15, 2.47 |
| Current smokers, 1- 14/d      | 17  | 10,852  | 1.92 | 1.16, 3.16 | -    | 1.89 1.14, 3.11 |
| Current smokers, 15- 24/d     | 9   | 6,835   | 1.61 | 0.82, 3.15 | -    | 1.59 0.81, 3.11 |
| Current smokers, $\geq 25$ /d | 6   | 5,251   | 1.40 | 0.62, 3.18 | -    | 1.39 0.61, 3.14 |
| $P_{\text{trend}}$            |     |         | 0.04 |            |      | 0.05            |

---

Abbreviations: CI, confidence interval; HPFS, Health Professionals' Follow-Up Study; NHS, Nurses' Health Study; NHS II, Nurses' Health Study II; RR, Relative Risk.

<sup>a</sup> Adjusted for age (continuous variable), race (Caucasian, Asian, Hispanic or African American), body mass index (<18.5, 18.5-24.9, 25-29.9, 30-34.9,  $\geq 35$  kg/m<sup>2</sup>), alcohol drinking (no, <4.9, 5.0-9.9, 10-14.9, 15-29.9 or  $\geq 30.0$  g/d), physical activity (metabolic equivalent hours/wk, quintile).

<sup>b</sup> Adjusted for the abovementioned variables, plus level of depressive symptomatology by Mental Health Index score (86-100, 76-85, 53-75, or 0-52) for NHS and NHS II.

<sup>c</sup> Adjusted for the abovementioned variables in <sup>a</sup>, plus anti depressive drugs use (never, past, or current).

**Web Table 2.** Age- and multivariate-adjusted RRs of psoriasis by pack-years of smoking in the Nurses' Health Study (1996-2008), the Nurses' Health Study-II (1991-2005), and Health Professionals' Follow-Up Study (1986-2006): additional analyses adjusting for depressive symptoms and antidepressive drug use

|                           | Cases | Person-<br>years | Multivariate,<br>adjusted <sup>a</sup> |             | Multivariate,<br>adjusted <sup>b</sup> |             | Multivariate,<br>adjusted <sup>c</sup> |             |  |
|---------------------------|-------|------------------|----------------------------------------|-------------|----------------------------------------|-------------|----------------------------------------|-------------|--|
|                           |       |                  | RR                                     | 95% CI      | RR                                     | 95% CI      | RR                                     | 95% CI      |  |
| <b>NHS</b>                |       |                  |                                        |             |                                        |             |                                        |             |  |
| Never smokers             | 295   | 352,829          | 1.00                                   |             | 1.00                                   |             | 1.00                                   |             |  |
| Pack-years, <10           | 115   | 133,475          | 1.03                                   | 0.83, 1.28  | 1.03                                   | 0.83, 1.28  | 1.02                                   | 0.82, 1.27  |  |
| Pack-years, 10-24         | 119   | 113,660          | 1.19                                   | 0.96, 1.48  | 1.19                                   | 0.96, 1.48  | 1.18                                   | 0.95, 1.47  |  |
| Pack-years, 25-44         | 149   | 93,231           | 1.80                                   | 1.47, 2.20  | 1.79                                   | 1.47, 2.19  | 1.78                                   | 1.45, 2.17  |  |
| Pack-years, 45-64         | 81    | 42,409           | 2.11                                   | 1.64, 2.71  | 2.09                                   | 1.63, 2.68  | 2.07                                   | 1.61, 2.66  |  |
| Pack-years, ≥65           | 45    | 16,900           | 2.84                                   | 2.07, 3.91  | 2.82                                   | 2.04, 3.88  | 2.79                                   | 2.03, 3.84  |  |
| <i>P</i> <sub>trend</sub> |       |                  | <0.0001                                |             | <0.0001                                |             | <0.0001                                |             |  |
| <b>NHS II</b>             |       |                  |                                        |             |                                        |             |                                        |             |  |
| Never smokers             | 629   | 868,253          | 1.00                                   |             | 1.00                                   |             | 1.00                                   |             |  |
| Pack-years, <10           | 174   | 202,479          | 1.20                                   | 1.02, 1.43  | 1.20                                   | 1.01, 1.42  | 1.20                                   | 1.01, 1.42  |  |
| Pack-years, 10-24         | 224   | 183,257          | 1.68                                   | 1.43, 1.96  | 1.67                                   | 1.43, 1.95  | 1.65                                   | 1.42, 1.93  |  |
| Pack-years, 25-44         | 84    | 50,487           | 1.97                                   | 1.56, 2.48  | 1.94                                   | 1.54, 2.45  | 1.93                                   | 1.53, 2.44  |  |
| Pack-years, 45-64         | 12    | 4,449            | 2.56                                   | 1.44, 4.56  | 2.51                                   | 1.41, 4.47  | 2.49                                   | 1.40, 4.43  |  |
| Pack-years, ≥65           | 1     | 261              | 2.93                                   | 0.41, 20.79 | 2.84                                   | 0.40, 20.17 | 2.87                                   | 0.40, 20.40 |  |
| <i>P</i> <sub>trend</sub> |       |                  | <0.0001                                |             | <0.0001                                |             | <0.0001                                |             |  |

---

**HPFS**

|                           |     |         |         |            |      |         |            |
|---------------------------|-----|---------|---------|------------|------|---------|------------|
| Never smokers             | 200 | 230,555 | 1.00    | -          | 1.00 |         |            |
| Pack-years, <10           | 60  | 46,570  | 1.45    | 1.09, 1.94 | -    | 1.44    | 1.07, 1.92 |
| Pack-years, 10-24         | 101 | 87,463  | 1.32    | 1.03, 1.68 | -    | 1.30    | 1.02, 1.66 |
| Pack-years, 25-44         | 78  | 55,374  | 1.59    | 1.21, 2.08 | -    | 1.57    | 1.20, 2.06 |
| Pack-years, 45-64         | 32  | 17,225  | 2.11    | 1.44, 3.10 | -    | 2.08    | 1.41, 3.05 |
| Pack-years, ≥65           | 11  | 5,117   | 2.28    | 1.23, 4.24 | -    | 2.25    | 1.21, 4.18 |
| <i>P</i> <sub>trend</sub> |     |         | <0.0001 |            |      | <0.0001 |            |

---

Abbreviations: CI, confidence interval; HPFS, Health Professionals' Follow-Up Study;

NHS, Nurses' Health Study; NHS II, Nurses' Health Study II; RR, Relative Risk.

<sup>a</sup> Adjusted for age (continuous variable), race (Caucasian, Asian, Hispanic or African American), body mass index (<18.5, 18.5-24.9, 25-29.9, 30-34.9, ≥35 kg/m<sup>2</sup>), alcohol drinking (no, <4.9, 5.0-9.9, 10-14.9, 15-29.9 or ≥30.0 g/d), physical activity (metabolic equivalent hours/wk, in quintile).

<sup>b</sup> Adjusted for the abovementioned variables, plus level of depressive symptomatology by Mental Health Index score (86-100, 76-85, 53-75, or 0-52) for NHS and NHS II.

<sup>c</sup> Adjusted for the abovementioned variables in <sup>a</sup>, plus anti depressive drugs use (never, past, or current).

**Web Table 3.** Age- and multivariate-adjusted RRs of psoriasis by smoking duration in the Nurses' Health Study (1996-2008), the Nurses' Health Study-II (1991-2005), and Health Professionals' Follow-Up Study (1986-2006): additional analyses adjusting for depressive symptoms and antidepressive drug use

|                           | Cases | Person-<br>years | Multivariate,<br>adjusted <sup>a</sup> |            | Multivariate,<br>adjusted <sup>b</sup> |            | Multivariate,<br>adjusted <sup>c</sup> |            |
|---------------------------|-------|------------------|----------------------------------------|------------|----------------------------------------|------------|----------------------------------------|------------|
|                           |       |                  | RR                                     | 95% CI     | RR                                     | 95% CI     | RR                                     | 95% CI     |
| <b>NHS</b>                |       |                  |                                        |            |                                        |            |                                        |            |
| Never smokers             | 295   | 352,829          | 1.00                                   |            | 1.00                                   |            | 1.00                                   |            |
| Duration, <10 years       | 50    | 73,803           | 0.81                                   | 0.60, 1.10 | 0.81                                   | 0.60, 1.10 | 0.81                                   | 0.60, 1.09 |
| Duration, 10-19.9 years   | 86    | 88,807           | 1.13                                   | 0.88, 1.43 | 1.12                                   | 0.88, 1.43 | 1.12                                   | 0.88, 1.42 |
| Duration, 20-29.9 years   | 102   | 79,502           | 1.45                                   | 1.15, 1.82 | 1.44                                   | 1.15, 1.81 | 1.43                                   | 1.14, 1.79 |
| Duration, ≥30 years       | 271   | 157,564          | 1.94                                   | 1.64, 2.30 | 1.92                                   | 1.62, 2.28 | 1.91                                   | 1.61, 2.26 |
| <i>P</i> <sub>trend</sub> |       |                  | <0.0001                                |            | <0.0001                                |            | <0.0001                                |            |
| <b>NHS II</b>             |       |                  |                                        |            |                                        |            |                                        |            |
| Never smokers             | 629   | 868,253          | 1.00                                   |            | 1.00                                   |            | 1.00                                   |            |
| Duration, <10 years       | 52    | 60,344           | 1.21                                   | 0.91, 1.61 | 1.21                                   | 0.91, 1.60 | 1.20                                   | 0.91, 1.60 |
| Duration, 10-19.9 years   | 224   | 231,677          | 1.35                                   | 1.16, 1.58 | 1.35                                   | 1.15, 1.57 | 1.34                                   | 1.15, 1.56 |
| Duration, 20-29.9 years   | 153   | 118,082          | 1.80                                   | 1.50, 2.15 | 1.78                                   | 1.48, 2.13 | 1.77                                   | 1.48, 2.12 |
| Duration, ≥30 years       | 66    | 30,829           | 2.07                                   | 1.59, 2.69 | 2.04                                   | 1.56, 2.65 | 2.03                                   | 1.56, 2.65 |
| <i>P</i> <sub>trend</sub> |       |                  | <0.0001                                |            | <0.0001                                |            | <0.0001                                |            |
| <b>HPFS</b>               |       |                  |                                        |            |                                        |            |                                        |            |
| Never smokers             | 200   | 230,555          | 1.00                                   |            | -                                      |            | 1.00                                   |            |

|                         |    |        |         |            |   |         |            |
|-------------------------|----|--------|---------|------------|---|---------|------------|
| Duration, <10 years     | 68 | 62,442 | 1.24    | 0.94, 1.64 | - | 1.22    | 0.93, 1.62 |
| Duration, 10-19.9 years | 70 | 53,423 | 1.49    | 1.13, 1.96 | - | 1.47    | 1.11, 1.94 |
| Duration, 20-29.9 years | 56 | 46,386 | 1.36    | 1.01, 1.84 | - | 1.34    | 1.00, 1.82 |
| Duration, ≥30 years     | 88 | 49,500 | 2.03    | 1.56, 2.64 | - | 2.00    | 1.53, 2.60 |
| $P_{\text{trend}}$      |    |        | <0.0001 |            |   | <0.0001 |            |

Abbreviations: CI, confidence interval; HPFS, Health Professionals' Follow-Up Study; NHS, Nurses' Health Study; NHS II, Nurses' Health Study II; RR, Relative Risk.

<sup>a</sup> Adjusted for age (continuous variable), race (Caucasian, Asian, Hispanic or African American), body mass index (<18.5, 18.5-24.9, 25-29.9, 30-34.9, ≥35 kg/m<sup>2</sup>), alcohol drinking (no, <4.9, 5.0-9.9, 10-14.9, 15-29.9 or ≥30.0 g/d), physical activity (metabolic equivalent hours/wk, in quintile).

<sup>b</sup> Adjusted for the abovementioned variables, plus level of depressive symptomatology by Mental Health Index score (86-100, 76-85, 53-75, or 0-52) for NHS and NHS II.

<sup>c</sup> Adjusted for the abovementioned variables in <sup>a</sup>, plus anti depressive drugs use (never, past, or current).

**Web Table 4.** Age- and multivariate-adjusted RRs of psoriasis by years since smoking cessation in the Nurses' Health Study (1996-2008), the Nurses' Health Study-II (1991-2005), and Health Professionals' Follow-Up Study (1986-2006): additional analyses adjusting for depressive symptoms and antidepressive drug use

|                               | <b>Cases</b> | <b>Person-<br/>years</b> | <b>Multivariate,<br/>adjusted<sup>a</sup></b> |               | <b>Multivariate,<br/>adjusted<sup>b</sup></b> |               | <b>Multivariate,<br/>adjusted<sup>c</sup></b> |               |
|-------------------------------|--------------|--------------------------|-----------------------------------------------|---------------|-----------------------------------------------|---------------|-----------------------------------------------|---------------|
|                               |              |                          | <b>RR</b>                                     | <b>95% CI</b> | <b>RR</b>                                     | <b>95% CI</b> | <b>RR</b>                                     | <b>95% CI</b> |
| <b>NHS</b>                    |              |                          |                                               |               |                                               |               |                                               |               |
| Never smokers                 | 295          | 352,829                  | 1.00                                          |               | 1.00                                          |               | 1.00                                          |               |
| Cessation, $\geq 40$ years    | 49           | 47,299                   | 1.11                                          | 0.81, 1.50    | 1.11                                          | 0.81, 1.50    | 1.10                                          | 0.81, 1.50    |
| Cessation, 30-39 years        | 71           | 81,524                   | 1.01                                          | 0.78, 1.31    | 1.01                                          | 0.78, 1.31    | 1.00                                          | 0.77, 1.30    |
| Cessation, 20-29 years        | 81           | 70,767                   | 1.30                                          | 1.01, 1.67    | 1.30                                          | 1.01, 1.66    | 1.28                                          | 1.00, 1.64    |
| Cessation, 10-19 years        | 109          | 81,441                   | 1.49                                          | 1.20, 1.87    | 1.49                                          | 1.19, 1.86    | 1.47                                          | 1.18, 1.84    |
| Cessation, 6-9 years          | 41           | 25,292                   | 1.85                                          | 1.33, 2.57    | 1.83                                          | 1.32, 2.55    | 1.82                                          | 1.31, 2.52    |
| Cessation, 3-5 years          | 32           | 19,123                   | 1.89                                          | 1.31, 2.73    | 1.88                                          | 1.30, 2.71    | 1.86                                          | 1.29, 2.69    |
| Cessation, $\leq 2$ years     | 12           | 11,228                   | 1.28                                          | 0.72, 2.28    | 1.27                                          | 0.71, 2.26    | 1.26                                          | 0.71, 2.25    |
| $P_{\text{trend}}^{\text{d}}$ |              |                          | <0.0001                                       |               | <0.0001                                       |               | <0.0001                                       |               |
| <b>NHS II</b>                 |              |                          |                                               |               |                                               |               |                                               |               |
| Never smokers                 | 629          | 868,253                  | 1.00                                          |               | 1.00                                          |               | 1.00                                          |               |
| Cessation, $\geq 40$ years    | 0            | 39                       | -                                             |               | -                                             |               | -                                             |               |
| Cessation, 30-39 years        | 14           | 8,986                    | 0.99                                          | 0.58, 1.70    | 0.99                                          | 0.58, 1.71    | 0.99                                          | 0.58, 1.71    |
| Cessation, 20-29 years        | 79           | 74,649                   | 1.12                                          | 0.88, 1.42    | 1.12                                          | 0.88, 1.42    | 1.11                                          | 0.87, 1.41    |
| Cessation, 10-19 years        | 126          | 130,123                  | 1.47                                          | 1.21, 1.79    | 1.47                                          | 1.21, 1.78    | 1.46                                          | 1.20, 1.77    |

|                               |     |         |        |            |        |            |        |            |
|-------------------------------|-----|---------|--------|------------|--------|------------|--------|------------|
| Cessation, 6-9 years          | 39  | 41,270  | 1.38   | 1.00, 1.91 | 1.37   | 0.99, 1.90 | 1.37   | 0.99, 1.89 |
| Cessation, 3-5 years          | 41  | 31,475  | 1.82   | 1.33, 2.50 | 1.81   | 1.32, 2.48 | 1.80   | 1.31, 2.47 |
| Cessation, $\leq 2$ years     | 33  | 24,548  | 1.93   | 1.36, 2.74 | 1.91   | 1.35, 2.72 | 1.90   | 1.34, 2.70 |
| $P_{\text{trend}}^{\text{d}}$ |     |         | 0.0003 |            | 0.0003 |            | 0.0003 |            |
| <b>HPFS</b>                   |     |         |        |            |        |            |        |            |
| Never smokers                 | 200 | 230,555 | 1.00   |            | -      |            | 1.00   |            |
| Cessation, $\geq 10$ years    | 208 | 155,158 | 1.45   | 1.19, 1.78 | -      |            | 1.43   | 1.17, 1.75 |
| Cessation, 6-9 years          | 21  | 13,778  | 1.93   | 1.22, 3.04 | -      |            | 1.91   | 1.21, 3.01 |
| Cessation, 3-5 years          | 10  | 9,950   | 1.27   | 0.67, 2.42 | -      |            | 1.25   | 0.66, 2.37 |
| Cessation, $\leq 2$ years     | 11  | 9,716   | 1.45   | 0.78, 2.67 | -      |            | 1.43   | 0.78, 2.64 |
| $P_{\text{trend}}^{\text{d}}$ |     |         | 0.50   |            |        |            | 0.50   |            |

Abbreviations: CI, confidence interval; HPFS, Health Professionals' Follow-Up Study; NHS, Nurses' Health Study; NHS II, Nurses' Health Study II; RR, Relative Risk.

<sup>a</sup> Adjusted for age (continuous variable), race (Caucasian, Asian, Hispanic or African American), body mass index (<18.5, 18.5-24.9, 25-29.9, 30-34.9,  $\geq 35$  kg/m<sup>2</sup>), alcohol drinking (no, <4.9, 5.0-9.9, 10-14.9, 15-29.9 or  $\geq 30.0$  g/d), physical activity (metabolic equivalent hours/wk, in quintile).

<sup>b</sup> Adjusted for the abovementioned variables, plus level of depressive symptomatology by Mental Health Index score (86-100, 76-85, 53-75, or 0-52) for NHS and NHS II.

<sup>c</sup> Adjusted for the abovementioned variables in <sup>a</sup>, plus anti depressive drugs use (never, past, or current).

<sup>d</sup> Never smokers were excluded from the trend test.
